# Supplementary material
Source: publisher figshare collection journal article supplement (https://karger.figshare.com/articles/dataset/_/6269774)
Supplement: Supplementary file 1 [file 1]

**Supplementary Table 1: The FISH probes employed in the analysis and the findings.**

| Case | Hybridization | Probe      | Locus    | Band                | Probe full name                                              | Labeling      | Producer, catalogue no.           | Result |
|------|---------------|------------|----------|---------------------|--------------------------------------------------------------|---------------|-----------------------------------|--------|
| 1    | 1             | cen 13/21  | D13/21Z1 | 13p10q10 / 21p10q10 | Satellite Enumeration Probe for centromeres 13/21            | TxR           | Cytocell Aquarius, LPE 013R       | +      |
|      |               | cen 14/22  | D14/22Z1 | 14p10q10 / 22p10q10 | Satellite Enumeration Probe for centromeres 14/22            | FITC          | Cytocell Aquarius, LPE 014G       | -      |
|      | 2             | PWACR      | D15S11   | 15q11.2             | Prader-Willi/Angelman Region Probe (D15S11) / CEP 15 (D15Z1) | SpO / SpG     | Abbott Molecular Vysis, 05J19-014 | -      |
|      |               | wcp 15     | chr. 15  | 15pter-qter         | Whole Chromosome probe for chromosome 15                     | PB415         | Kreatech Poseidon, KBI-30015B     | -      |
|      | 3             | wcp 13     | chr. 13  | 13pter-qter         | XCyting Chromosome Paint for chromosome 13                   | SpO           | MetaSystems, D-0313-050-OR        | -      |
|      |               | wcp 21     | chr. 21  | 21pter-qter         | Whole Chromosome Painting Probe for chromosome 21            | FITC          | Cytocell Aquarius, LPP 21G        | -      |
| 2    | 1             | XIST       | XIST     | Xq13                | XIST specific FISH probe (Xq13/Xcen)                         | PB495 / PB550 | Kreatech Poseidon, KBI-40108      | +      |
|      | 2             | SRY        | SRY      | Yp11.3              | SRY Probe                                                    | SpO           | Abbott Molecular Vysis, 05J27-079 | -      |
|      |               | cen Y      | DYZ3     | Yp10q10             | XCyting Centromere Enumeration Probe for chromosome Y        | aqua          | MetaSystems, D-0824-050-BL        | -      |
| 3    | 1             | cen 13/21  |          |                     | See Case 1                                                   |               |                                   | -      |
|      |               | cen 14/22  |          |                     | See Case 1                                                   |               |                                   | -      |
|      | 2             | PWACR      |          |                     | See Case 1                                                   |               |                                   | -      |
|      |               | wcp 15     |          |                     | See Case 1                                                   |               |                                   | -      |
|      | 3             | cen-mFISH  |          |                     | XCyting Centromere Multi-Color Probe Mix                     | multi         | MetaSystems, D-0127-060-DI        | 3      |
| 4    | 4             | cen 3      | D3Z1     | 3p10q10             | Satellite Enumeration Probe for centromere 3                 | TxR           | Cytocell Aquarius, LPE 003R       | +      |
|      | 1             | cen 13/21  |          |                     | See Case 1                                                   |               |                                   | -      |
|      |               | cen 14/22  |          |                     | See Case 1                                                   |               |                                   | -      |
|      | 2             | PWACR      |          |                     | See Case 1                                                   |               |                                   | -      |
|      |               | wcp 15     |          |                     | See Case 1                                                   |               |                                   | -      |
|      | 3             | cen-mFISH  |          |                     | See Case 3                                                   |               |                                   | 17     |
|      | 4             | cen 17     | D17Z1    | 17p10q10            | XCyting Centromere Enumeration Probe for chromosome 17       | FITC          | MetaSystems, D-0817-050-FI        | +      |
|      | 5             | SMS (RAI1) | D17S447  | 17p11.2             | Smith-Magenis (RAI1)/Miller-Dieker Region                    | FITC          | Cytocell Aquarius, LPU 019        | +      |
|      |               | MDS        | D17S2027 | 17p13.3             |                                                              | TxR           |                                   | -      |
|      | 6             | TOP2A      | D17S1238 | 17q21               | TOP2A (17q21) specific DNA Probe                             | PB550         | Kreatech Poseidon, KBI-10724      | -      |

**Labeling:** TxR, Texas Red; FITC, fluorescein isothiocyanate (green); SpO, Spectrum Orange; SpG, Spectrum Green; PB415, Platinum Bright 415 (blue); PB495, Platinum Bright 495 (green); PB550, Platinum Bright 550 (red); aqua, a not specified blue fluorochrome, e.g. DEAC (diethylaminocoumarin); multi, multicolor labeling.

**Results:** +, probe present on the sSMC; -, probe absent on the sSMC; #, chromosome indicated by centromeric mFISH.
