# Supplementary material
Source: publisher figshare collection journal article supplement (https://karger.figshare.com/articles/dataset/_/6269774)
Supplement: Supplementary file 2 [file 1]

| Supplementary Table 2: The growth parameters of Cases 1-3. |      |           |                                       |         |                 |         |                    |         |
|------------------------------------------------------------|------|-----------|---------------------------------------|---------|-----------------|---------|--------------------|---------|
|                                                            | Sex  | Age       | Weight                                |         | Length / height |         | Head circumference |         |
|                                                            |      |           | [kg]                                  | centile | [cm]            | centile | [cm]               | centile |
| Case 1                                                     | boy  | at birth  | 4.5                                   | 97      | 53              | 80      | n.a.               |         |
|                                                            |      | 2 months  | 6.0                                   | 96      | n.a.            |         | 40                 | 84      |
|                                                            |      | 3 years   | 17.8                                  | 91      | 102             | 83      | 50.5               | 59      |
| Case 2                                                     | girl | at birth  | 3.4                                   | 50      | 48              | 13      | n.a.               |         |
|                                                            |      | 6 months  | 5.4                                   | <1      | 64              | 14      | 41                 | 10      |
|                                                            |      | 16 months | beginning of growth hormone treatment |         |                 |         |                    |         |
|                                                            |      | 21 months | 11.2                                  | 32      | 82.8            | 27      | n.a.               |         |
|                                                            |      | 4 years   | 18.1                                  | 65      | 107.5           | 64      | 50.5               | 66      |
| Case 3                                                     | girl | at birth  | 3.4                                   | 45      | 49              | 20      | n.a.               |         |
|                                                            |      | 1 year    | 9.6                                   | 50      | 75              | 49      | 45                 | 32      |
|                                                            |      | 3 years   | 14.4                                  | 45      | 95              | 34      | n.a.               |         |

n.a. = not available
