# Supplementary material
Source: publisher figshare collection journal article supplement (https://karger.figshare.com/articles/dataset/_/6269774)
Supplement: Supplementary file 3 [file 1]

| Supplementary Table 3: Protein-coding and disease-causing genes present on the sSMCs. |                  |                 |                  |        |                   |
|---------------------------------------------------------------------------------------|------------------|-----------------|------------------|--------|-------------------|
| protein-coding<br>disease-causing*                                                    | Case 2 - sSMC(X) |                 | Case 3 - sSMC(3) |        | Case 4 - sSMC(17) |
|                                                                                       | 96               |                 | 55               |        | 40                |
|                                                                                       | 34               |                 | 9                |        | 4                 |
|                                                                                       | PABPC1L2A        | <b>MSN</b>      | CADM2            | PCNP   | TOP3A             |
|                                                                                       | P2RY4            | CXorf49         | VGLL3            | ZBTB11 | SMCR8             |
|                                                                                       | <b>ATRX</b>      | <b>ATP7A</b>    | <b>CHMP2B</b>    | RPL24  | SHMT1             |
|                                                                                       | ITGB1BP2         | ACRC            | <b>POU1F1</b>    | CEP97  | EVPLL             |
|                                                                                       | ARR3             | <b>GJB1</b>     | HTR1F            | NXPE3  | LGALS9C           |
|                                                                                       | CXorf65          | HEPH            | CGGBP1           | NFKBIZ | FAM106A           |
|                                                                                       | PGAM4            | DMRTC1          | ZNF654           | ZPLD1  | TBC1D28           |
|                                                                                       | <b>XIST</b>      | PABPC1L2B       | C3orf38          |        | ZNF286B           |
|                                                                                       | <b>PHKA1</b>     | PJA1            | EPHA3            |        | TVP23B            |
|                                                                                       | <b>SLC16A2</b>   | FAM155B         | <b>PROS1</b>     |        | PRPSAP2           |
|                                                                                       | NAP1L2           | <b>DLG3</b>     | <b>ARL13B</b>    |        | SLC5A10           |
|                                                                                       | CXorf49B         | <b>RLIM</b>     | STX19            |        | FAM83G            |
|                                                                                       | UPRT             | CHIC1           | DHFR2            |        | GRAP              |
|                                                                                       | GDPD2            | MIR223          | NSUN3            |        | LOC388436         |
|                                                                                       | PIN4             | BRAFP1          | EPHA6            |        | LOC79999          |
|                                                                                       | STARD8           | SNX12           | <b>ARL6</b>      |        | GRAPL             |
|                                                                                       | <b>NONO</b>      | RPS4X           | CRYBG3           |        | EPN2              |
|                                                                                       | RAB41            | MTMR8           | RIOX2            |        | <b>B9D1</b>       |
|                                                                                       | <b>HDAC8</b>     | FTX             | GABRR3           |        | MAPK7             |
|                                                                                       | P2RY10           | ZC3H12B         | OR5AC2           |        | MFAP4             |
|                                                                                       | <b>LAS1L</b>     | EDA2R           | OR5H1            |        | RNF112            |
|                                                                                       | TAF9B            | ASB12           | OR5H14           |        | SLC47A1           |
|                                                                                       | ZMYM3            | OTUD6A          | OR5H15           |        | <b>ALDH3A2</b>    |
|                                                                                       | FLJ44635         | ERCC6L          | OR5H6            |        | SLC47A2           |
|                                                                                       | <b>OGT</b>       | CXCR3           | OR5H2            |        | ALDH3A1           |
|                                                                                       | LPAR4            | <b>EFNB1</b>    | OR5K4            |        | ULK2              |
|                                                                                       | INGX             | <b>KIAA2022</b> | OR5K3            |        | <b>AKAP10</b>     |
|                                                                                       | <b>TAF1</b>      | MAGEE1          | OR5K1            |        | SPECC1            |
|                                                                                       | <b>OPHN1</b>     | VSIG4           | OR5K2            |        | FAM106B           |
|                                                                                       | PBDC1            | NHSL2           | CLDND1           |        | LGALS9B           |
|                                                                                       | YIPF6            | <b>COX7B</b>    | GPR15            |        | CDRT15L2          |
|                                                                                       | ZCCHC5           | NLGN3           | <b>CPOX</b>      |        | CCDC144NL         |
|                                                                                       | CDX4             | FOXO4           | ST3GAL6          |        | USP22             |
|                                                                                       | AWAT1            | <b>ZC4H2</b>    | DCBLD2           |        | DHRS7B            |
|                                                                                       | SPIN4            | <b>ZDHHC15</b>  | COL8A1           |        | NATD1             |
|                                                                                       | DGAT2L6          | <b>ABCB7</b>    | CMSS1            |        | MAP2K3            |
|                                                                                       | RGAG4            | <b>FGF16</b>    | FILIP1L          |        | KCNJ12            |
|                                                                                       | MAGEE2           | <b>TEX11</b>    | TBC1D23          |        | <b>KCNJ18</b>     |
|                                                                                       | <b>MED12</b>     | CITED1          | NIT2             |        | C17orf51          |
|                                                                                       | AWAT2            | <b>MAGT1</b>    | TOMM70           |        | MTRNR2L1          |
|                                                                                       | TSIX             | <b>EDA</b>      | LNP1             |        |                   |
|                                                                                       | CYSLTR1          | <b>PGK1</b>     | TMEM45A          |        |                   |
|                                                                                       | PDZD11           | JPX             | ADGRG7           |        |                   |
|                                                                                       | <b>IL2RG</b>     | ZCCHC13         | <b>TFG</b>       |        |                   |
|                                                                                       | <b>AMER1</b>     | <b>IGBP1</b>    | ABI3BP           |        |                   |
|                                                                                       | DMRTC1B          | <b>ARHGEF9</b>  | <b>IMPG2</b>     |        |                   |
|                                                                                       | <b>KIF4A</b>     | SLC7A3          | SENP7            |        |                   |
|                                                                                       | <b>AR</b>        | <b>NLGN3</b>    | <b>TRMT10C</b>   |        |                   |

Disease-causing genes (in bold) are associated with recessive disorders or dominant disorders with different etiology than amplification / over-expression.
